# Supplementary material
Source: publisher figshare collection journal article supplement (https://gsajournals.figshare.com/ndownloader/files/20183162)
Supplement: Supplementary file 1 [file 20183162]

**Figure S3**


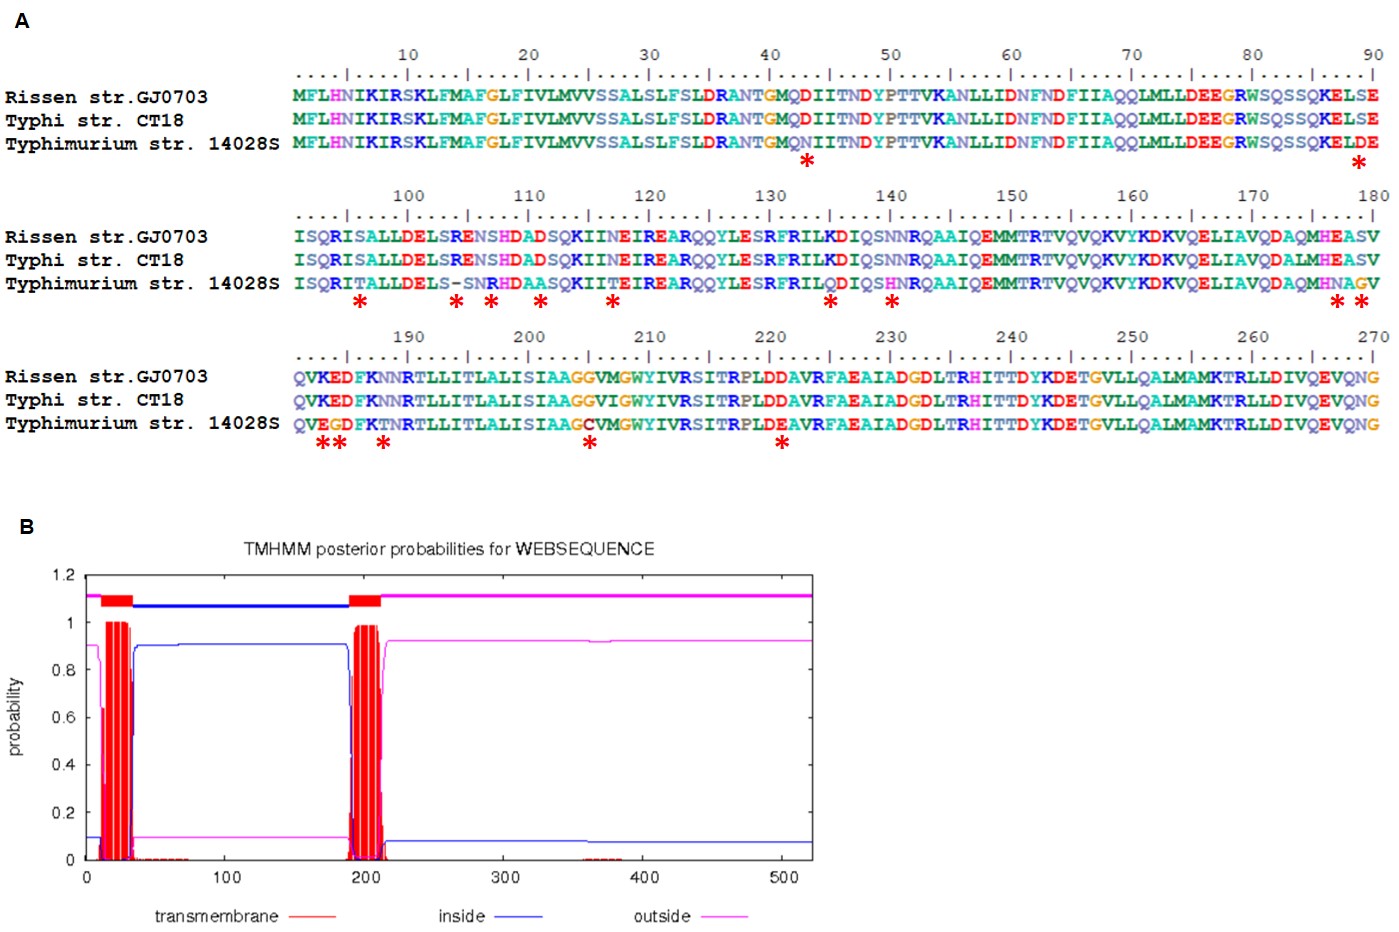


**Amino acid variation in McpC.** (A) Asterisks denote 16 amino acids variation in *S*. Rissen, S. Typhi and *S*. Typhimurium. The amino acid alignment was performed by BioEdit 7.0. (B) The prediction of transmembrane domains was performed resorting to Center for Biological Sequence analysis (http://www.cbs.dtu.dk/services/TMHMM/). There are 2 outside domains, 2 transmembrane domains and 1 inside domain. Most of the amino acid variations (14/16) locate in the inside domain, the ligand binding sites of McpC, as shown in the black box.
